# Supplementary material for: Nutrients and pheromones promote insulin release to inhibit courtship drive
Source: PubMed Central journal article supplement — Sci Adv. 2022 Mar 9;8(10):eabl6121. doi: 10.1126/sciadv.abl6121 (PMC8906733; doi:10.1126/sciadv.abl6121), 2022-03-09
Supplement: sciadv.abl6121_sm.pdf [file sciadv.abl6121_sm.pdf]

Supplementary Materials for  
**Nutrients and pheromones promote insulin release to inhibit courtship drive**

Liwei Zhang\*, Xuan Guo, Wei Zhang\*

\*Corresponding author. Email: wei\_zhang@mail.tsinghua.edu.cn (W.Z.); lwzhang@cau.edu.cn (L.Z.)

Published 9 March 2022, *Sci. Adv.* **8**, eabl6121 (2022)  
DOI: 10.1126/sciadv.abl6121

**This PDF file includes:**

Figs. S1 to S8  
Table S1

## Supplementary figures and table

Fig. S1

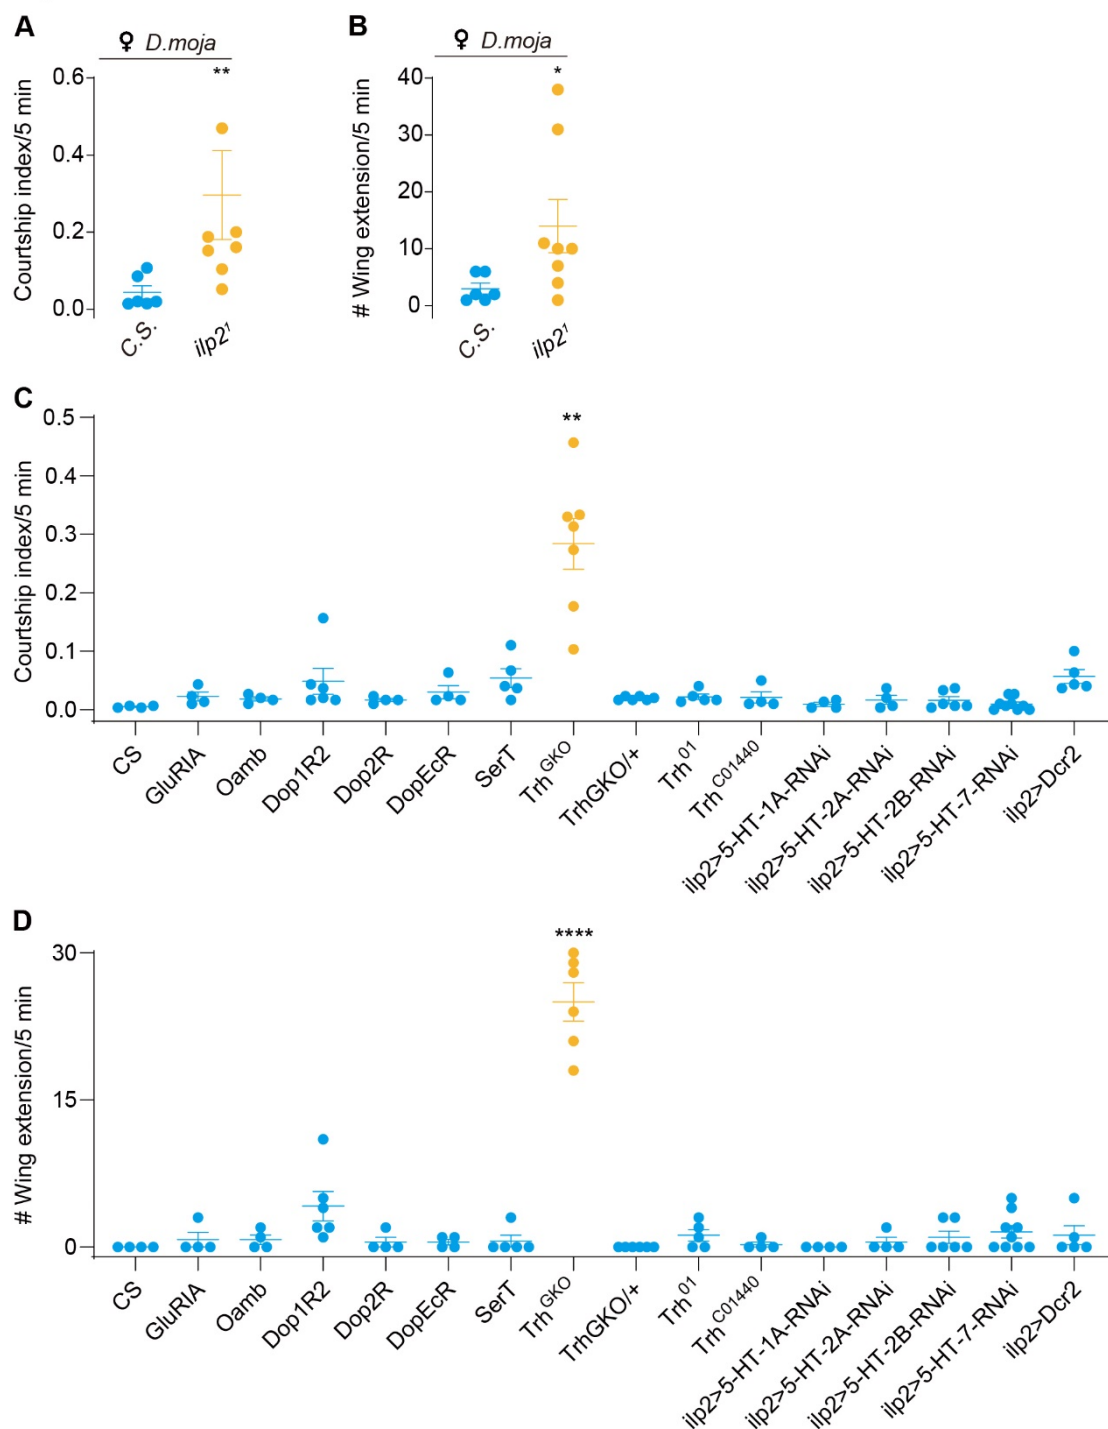

**Fig. S1. Screening for neurotransmitter genes involved in inter-male courtship.** (A and B) *ilp2<sup>1</sup>* mutant males exhibited increased courtship activity towards *D. mojavensis* virgin females. Courtship index and single-wing extension number were quantified in CS and *ilp2<sup>1</sup>* mutant males. N=6-7 for each genotype. Mann-Whitney nonparametric test was used. \*\*p < 0.01, \*p < 0.05. Data were represented as mean ± SEM. (C and D) No inter-male courtship was observed in the mutants of neurotransmitter or receptor genes except for the *Trh<sup>GKO</sup>* mutant males. Knocking down serotonin receptors in IPCs displayed no inter-male courtship. Courtship index (A) and single-wing extension

number (B) between males with indicated genotypes. N=4-7 in each group. One-way ANOVA followed with Dunnett test for multiple comparisons was used and statistical differences were represented as following: \*\*p < 0.01, \*\*\*\*p < 0.0001. Data were represented as mean ± SEM.

**Fig. S2**

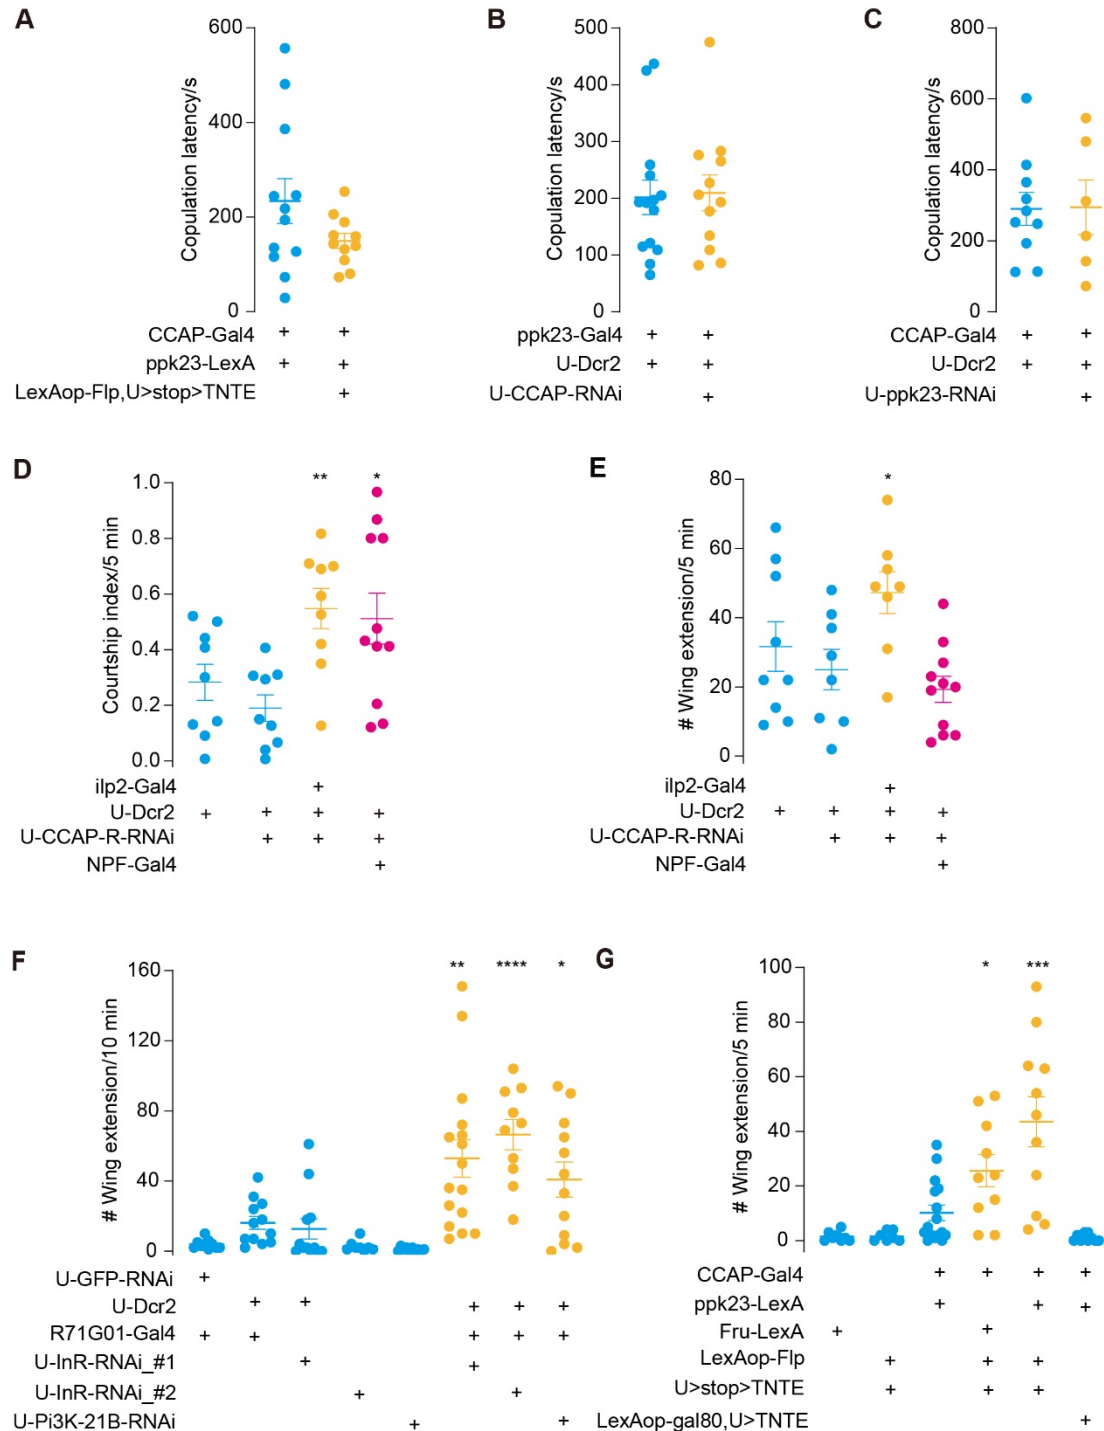

**Fig. S2. Knockdown CCAP or silencing CCAP/PPK23 co-labeled neurons didn't affect male-female courtship.** (A to C) Courtship activity between pairs of indicated males and *w<sup>1118</sup>* virgin female. None of silencing CCAP/PPK23 neurons in (A), suppressing CCAP expression by PPK23-Gal4 in (B) or suppressing *ppk23* expression by CCAP-Gal4 in (C) disrupted male-female courtship.

N =11-12 in each group of (A), n=12-14 in each group of (B) and n=6-10 in each group of (C). Mann-Whitney nonparametric tests were used. Data were represented as mean  $\pm$  SEM. (D and E) Courtship index and single-wing extension number in indicated groups. One-way ANOVA nonparametric Kruskal-Wallis tests followed with Dunn's test compared with U-Dcr2; U-CCAP-RNAi group were used. Data were represented as mean  $\pm$  SEM. N=7-12 in each group. \*p < 0.05, \*\*\*p < 0.001. (F) Single-wing extension numbers in indicated groups when InR signaling in P1 neurons were disrupted. N=7-12 in each group. One-way ANOVA nonparametric Kruskal-Wallis tests followed with Dunn's test compared with R71G01-Gal4 were used. Data were represented as mean  $\pm$  SEM. \*p < 0.05, \*\*p < 0.01, \*\*\*\*p < 0.0001. (G) Single-wing extension numbers in indicated groups when ppk23/CCAP neurons were silenced. N=7-11 in each group. One-way ANOVA nonparametric Kruskal-Wallis tests followed with Dunn's test compared with Fru-LexA was used. Data were represented as mean  $\pm$  SEM. \*p < 0.05, \*\*p < 0.001.

**Fig. S3**

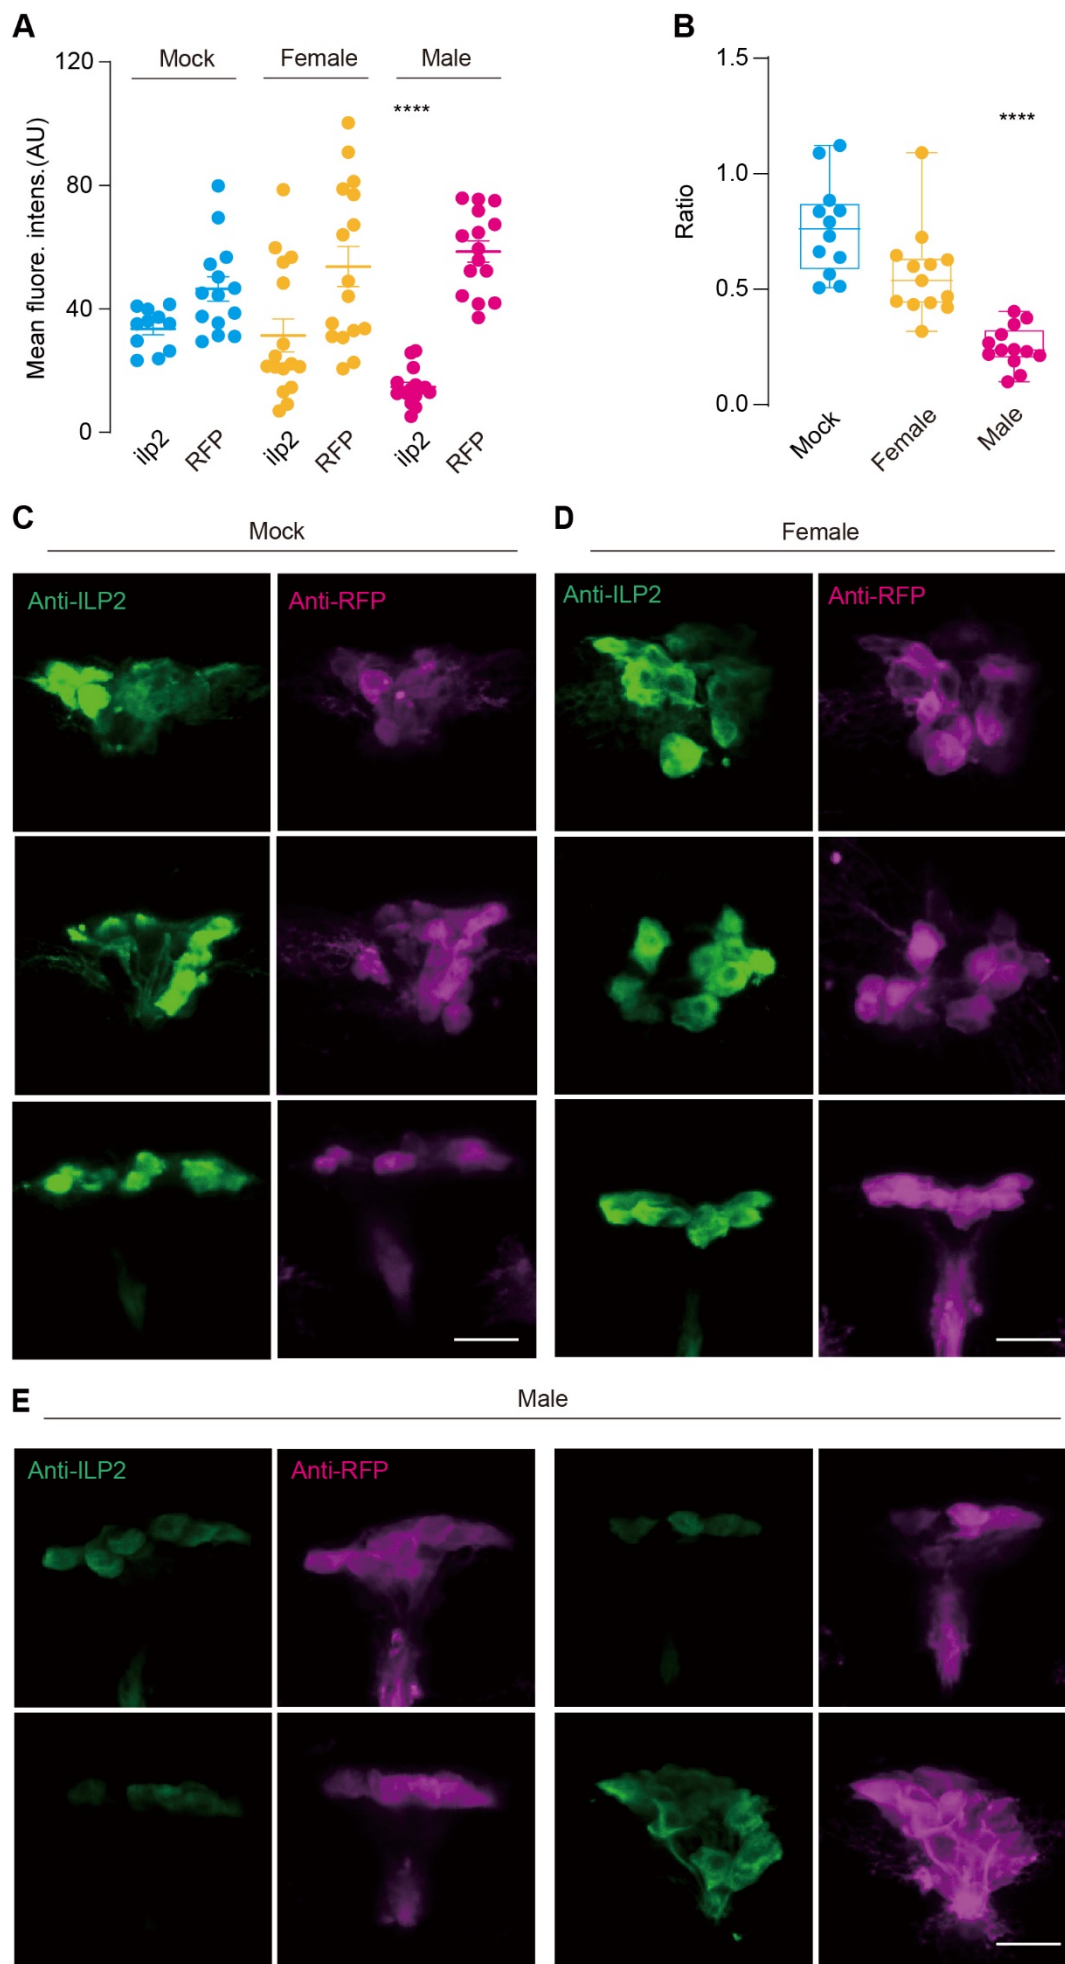

**Fig. S3. Quantification of ILP2 release in IPCs.** (A) Mean fluorescence intensities in IPCs stained with ILP2 and RFP antibodies respectively. In two adjacent groups, A.U. values between anti-ILP2 and anti-RFP were compared. Males (*ilp2-LexA/+; lexAop-mCD2-RFP/+*) were grouped with conspecific female and male, as well as mock control. Mann-Whitney nonparametric tests were used in each treatment. Data were represented as mean  $\pm$  SEM. \*\*\*\* $p < 0.0001$ . (B) A.U. value ratios (anti-ILP2 divided by anti-RFP) were quantified between genotypes in (A). One-way ANOVA nonparametric Kruskal-Wallis tests followed with Dunn's test compared with mock group were used. Data were represented as mean  $\pm$  SEM. \*\*\*\* $p < 0.0001$ . (C-E) More image samples from three groups in (A). Bar: 20 $\mu$ m.

**Fig. S4**

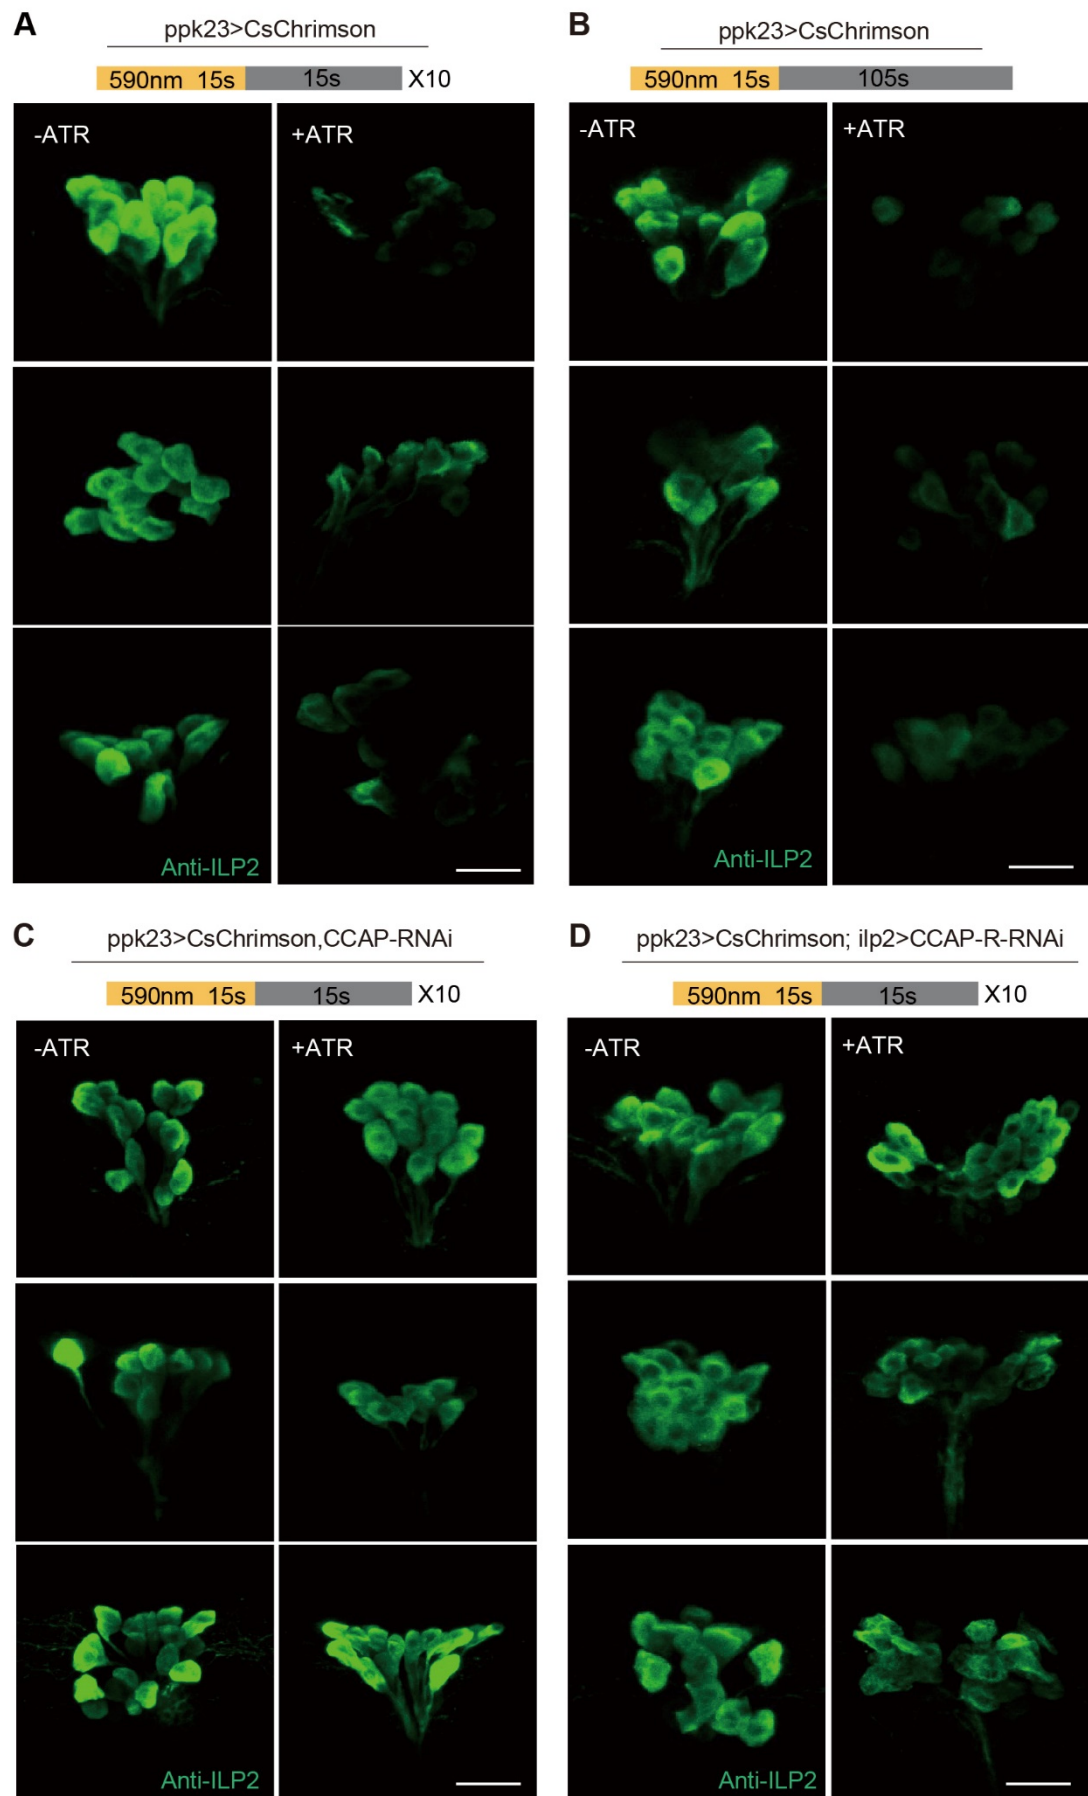

**Fig. S4. Image samples of ILP2 immunostainings in various manipulations.** (A to D) IPCs immunostaining intensities after optogenetic activation of ppk23+ cells (A and B), coupled with CCAP-RNAi in ppk23+ cells (C) or coupled with CCAP-R-RNAi in IPCs (D). Bar: 20µm.

**Fig. S5**

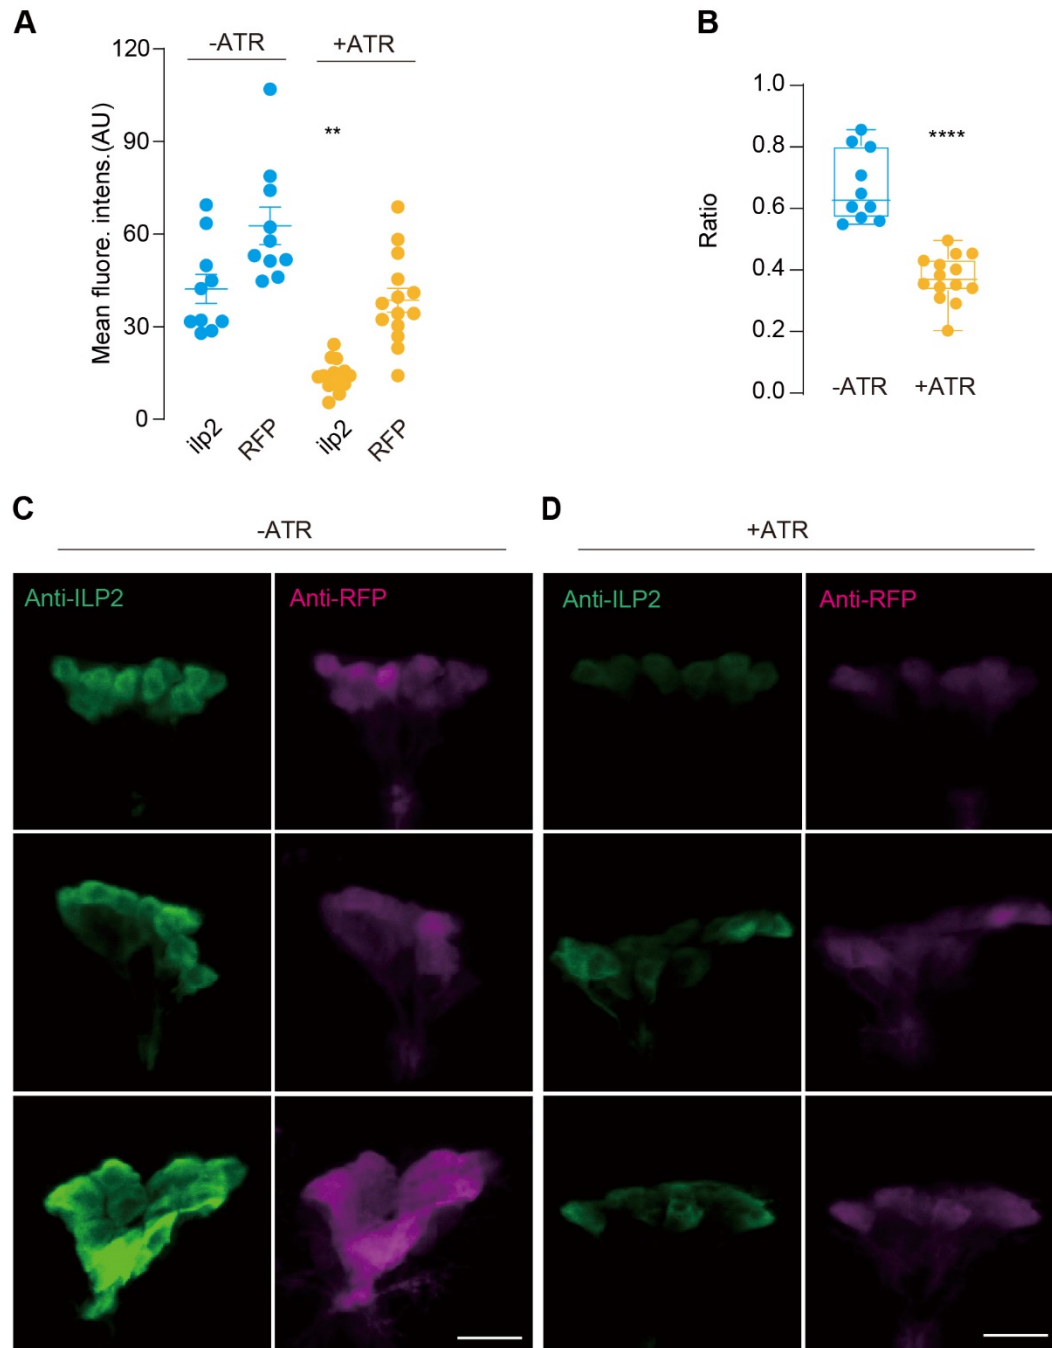

**Fig. S5. Quantification of ILP2 level under optogenetic manipulations.** (A) Mean fluorescence intensity (A.U.) of ILP2 and RFP when supplied with all-trans retinal (+ATR) or not (-ATR) in males (UAS-CsChrimson/ilp2-lexA; LexAop-mCD2-RFP/ppk23-gal4). Related to Fig. 5G. The diminishment of RFP intensity in +ATR treatment might be from either accompanying release with DILPs or reduced transcript level of RFP during the long-term activation of IPCs. (B) Normalization (ratio) of ILP2 immuno-intensity with respect to RFP level with all-trans retinal (+ATR) or not (-



ATR) in males (UAS-CsChrimson/ilp2-lex; LexAop-RFP/ppk23-gal4) related to (A). (C and D)  
More image samples from two groups in (A). Bar: 20µm.

**Fig. S6**

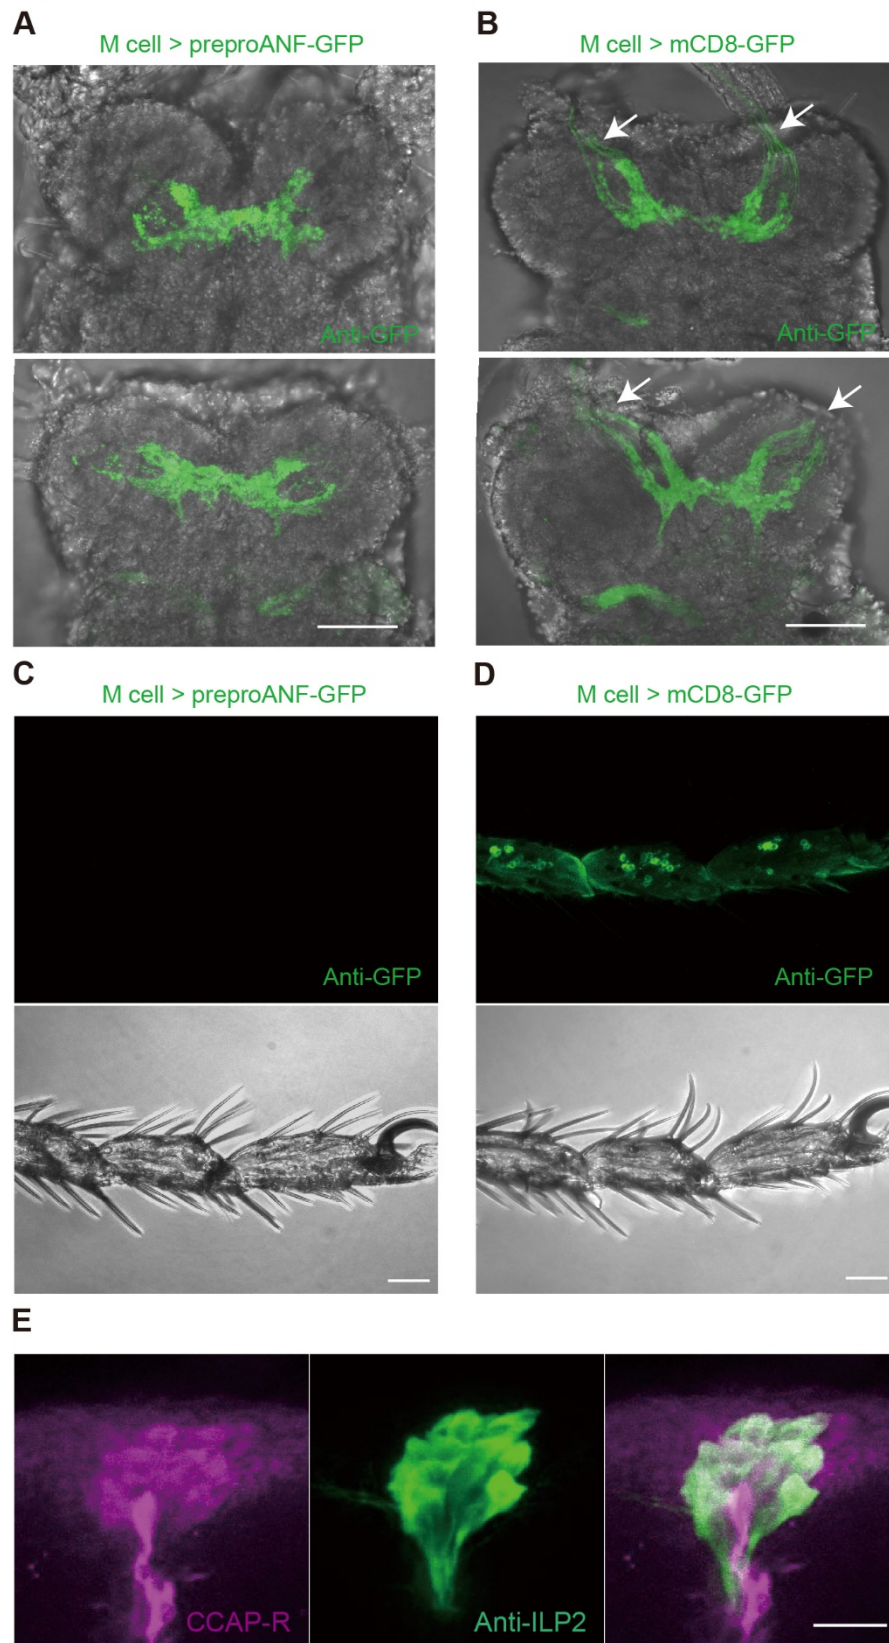

**Fig. S6. Dense core vesicles localizations in ppk23+/CCAP+ cells axon and expression of CCAP-R on IPCs.** (A) Visualization of dense core vesicles in M-cells' (vGlut-Gal80; ppk23-Gal4) axonal projections in the VNC. Anti-GFP signals were observed in males of ppk23-Gal4>UAS-preproANF-Emerald. No staining signal was observed outside the VNC, indicating that neuropeptides were released within the VNC. Bar: 20µm. (B) Visualization of axonal projections of M-cells (vGlut-Gal80; ppk23-Gal4) in the VNC. Anti-GFP signals were observed in males of ppk23-Gal4>UAS-mCD8-GFP. White arrow indicated the fiber bundles that enter the VNC from leg ppk23+ neurons. Bar: 20 µm. (C) No dense core vesicles signal was found on male legs (vGlut-Gal80; ppk23-Gal4>UAS-preproANF-Emerald). Bar: 20 µm. (D) ppk23+ neurons were found on male legs with GFP (vGlut-Gal80; ppk23-Gal4>UAS-mCD8-GFP). Bar: 20 µm. (E) Co-localization between CCAP-R+ neurons (R64B05-Gal4>GFP) and IPCs (anti-ILP2). Bar: 20 µm.

**Fig. S7**

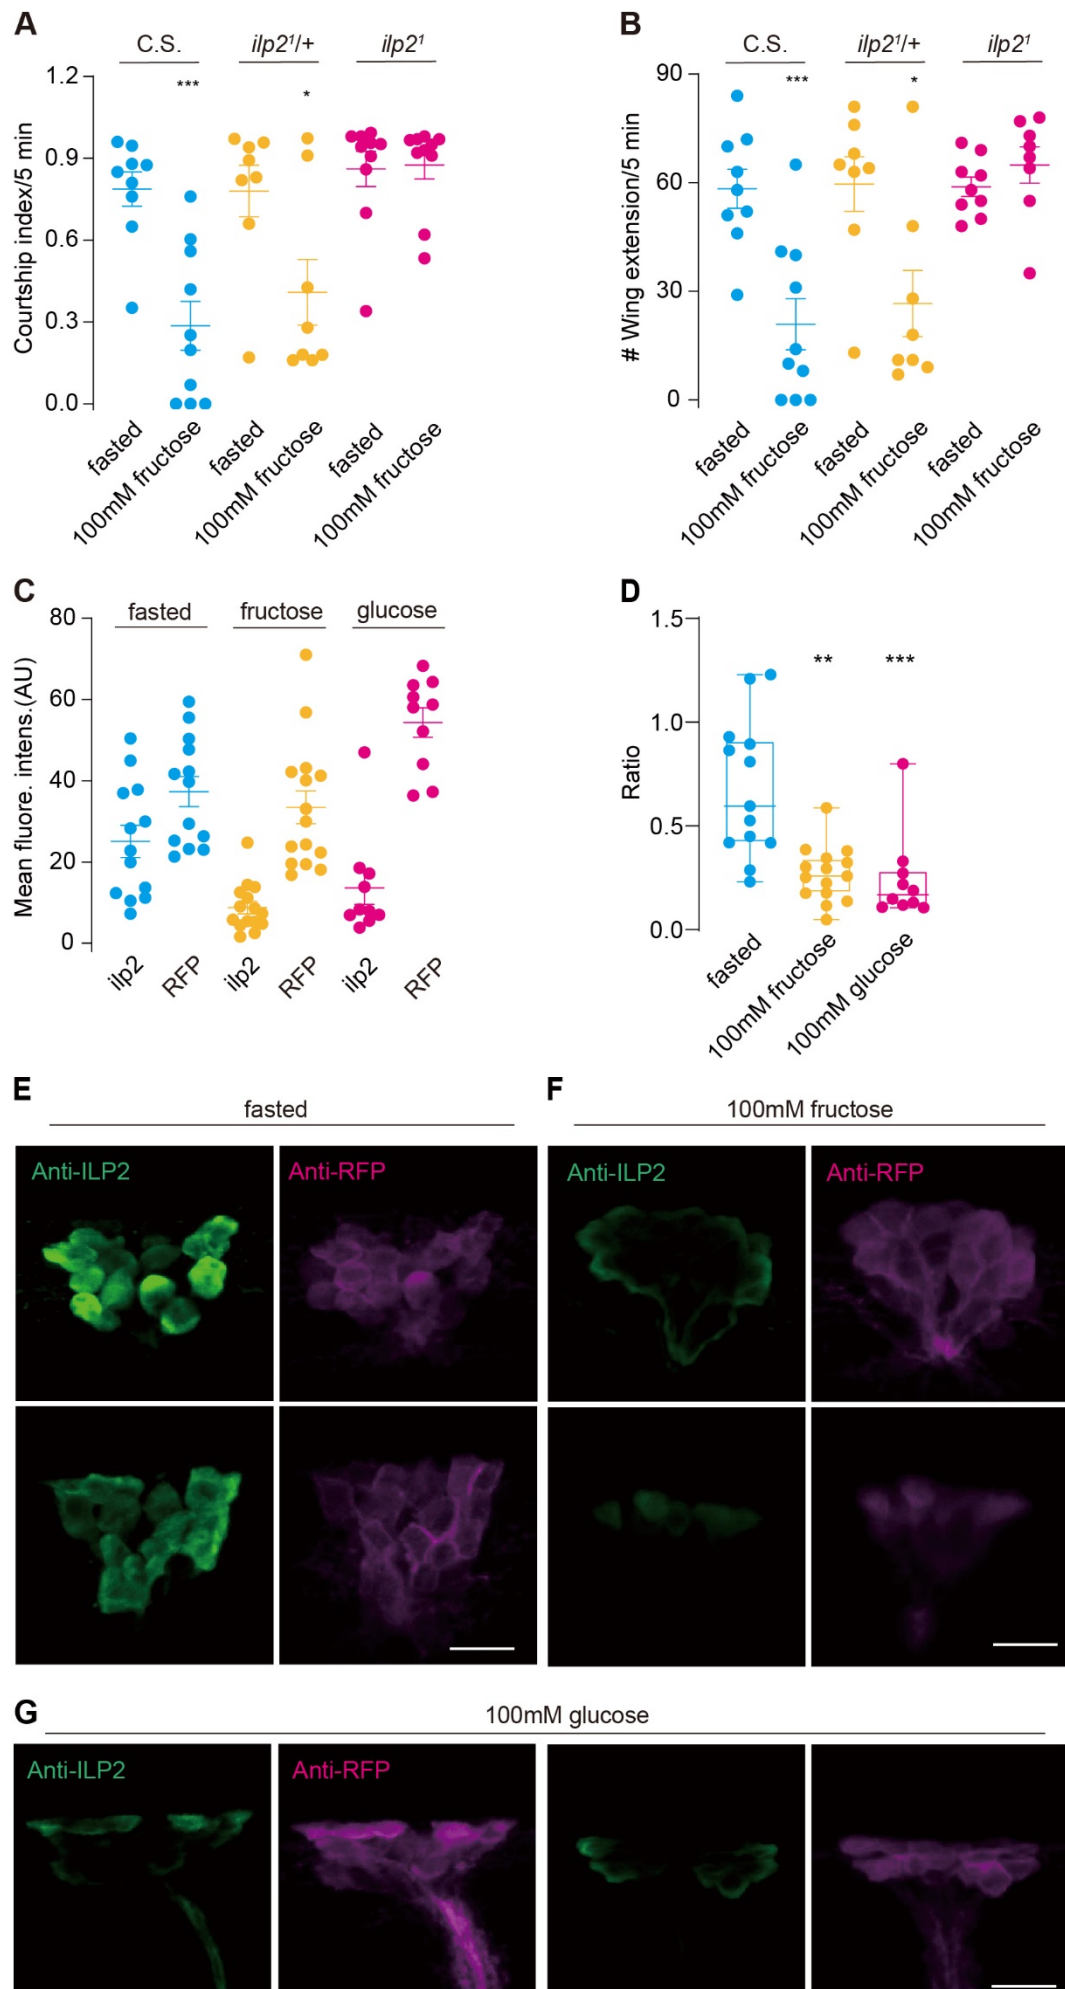

**Fig. S7. Effects of sugar meal on courtship in fasted males.** (A and B) Courtship and single-wing extension number in CS, *ilp2<sup>1</sup>* heterozygous and *ilp2<sup>1</sup>* homozygous mutant males toward *w<sup>1118</sup>* virgin females. All males were starved for 16 hours during which water was supplied, and then fed with 100 mM fructose for 3 min before test. Mann-Whitney nonparametric test was used in two groups of the same genotypes. \**p* < 0.05, \*\*\**p* < 0.001. Data were represented as mean ± SEM. (C) Mean fluorescence intensity (A.U.) of ILP2 and RFP in fasted, fructose- or glucose-fed males related to Fig. 3A-B. (D) Normalization (ratio) of ILP2 immuno-intensity with respect to RFP level in fasted, fructose- or glucose-fed males related to (C). One-way ANOVA nonparametric Kruskal-Wallis tests followed with Dunn's test compared with fasted group were used. Data were represented as mean ± SEM. \*\**p* < 0.01, \*\*\**p* < 0.001. (E to G) Representative samples from three groups in (C). Bar: 20 μm.

**Fig. S8**

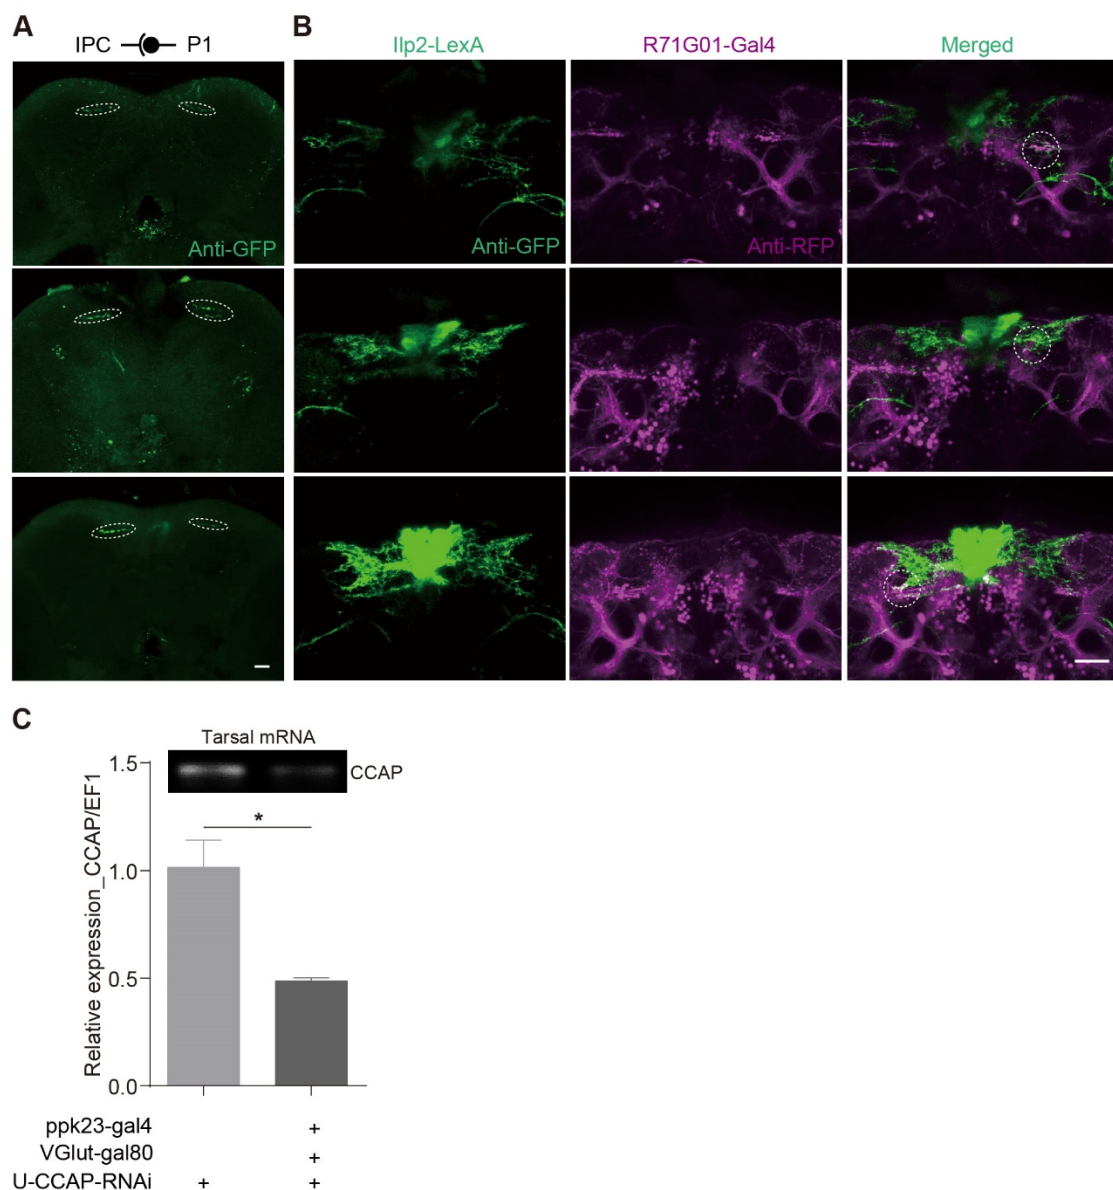

**Fig. S8. Putative connections between IPCs and P1 neurons and CCAP expression in M-cells.** (A) GRASP signals were detected between IPCs and P1 neurons. Genotype: *ilp2-LexA/+*; UAS-

CD4-spGFP1-10, LexAop-CD4-spGFP11/R71G01-Gal4. Dotted circles indicated the GRASP signals. Bar: 20  $\mu$ m. **(B)** Spatial relation between IPCs and P1 neurons. Genotype: *ilp2-LexA/UAS-tdTomato*; *LexAop-mCD8-GFP/R71G01-Gal4*. Dotted circles indicated the adjacent regions where IPCs and P1 neurons are in close proximity. Bar: 20  $\mu$ m. **(C)** Q-PCR quantification of leg tarsal CCAP transcripts. Top gel image was correlated with column below. *UAS-CCAP-RNAi* males were used as control and *vGlut-Gal80*; *ppk23-Gal4>UAS-CCAP-RNAi* males were treatment group. Mann-Whitney nonparametric test was used for statistical analysis. N=3 for each group. \**p* < 0.05. Data were represented as mean  $\pm$  SEM.

**Table. S1. RNAi lines and mutant alleles used in screening.**

| Lines used in Figure 3.               |        | Lines used in Figure S1.               |        |
|---------------------------------------|--------|----------------------------------------|--------|
| Gene/Allele                           | BDSC # | Gene/Allele                            | BDSC # |
| Dromyosuppressin R                    | 25832  | <i>GluRIA<sup>attP</sup></i>           | 84506  |
| <i>Fmrf</i> R                         | 25858  | <i>Oamb<sup>del</sup></i>              | 84707  |
| Diuretic hormone 31 R1                | 25925  | <i>Dop1R2<sup>KO</sup></i>             | 84719  |
| Allatostatin R2                       | 25935  | <i>Dop2R<sup>KO</sup></i>              | 84720  |
| Leucokinin R                          | 25936  | <i>DopEcR<sup>KOGal4</sup></i>         | 84717  |
| NPF R                                 | 25939  | <i>SerT<sup>attP</sup></i>             | 84572  |
| Capa R                                | 27275  | <i>Trh<sup>GKO</sup></i>               | 86146  |
| Allatostatin R                        | 27280  | <i>Trh<sup>01</sup></i>                | 86147  |
| CCK like R                            | 27494  | <i>Trh<sup>e01440</sup></i>            | 10531  |
| CCHamide-1 R                          | 27669  | <i>UAS-5-HT1A-IR<sup>JF01852</sup></i> | 25834  |
| Allatostatin C R1                     | 27506  | <i>UAS-5-HT2A-IR<sup>JF02157</sup></i> | 31882  |
| short NPF R                           | 27507  | <i>UAS-5-HT1B-IR<sup>JF01851</sup></i> | 25833  |
| Fsh-Tsh-Like R                        | 27509  |                                        |        |
| Tachykinin-like R at 99D              | 27513  |                                        |        |
| Dromyosuppressin R1                   | 27529  |                                        |        |
| Pyrokinin 1 R                         | 27539  |                                        |        |
| Eclosion hormone R                    | 38346  |                                        |        |
| Diuretic hormone 44 R1                | 28780  |                                        |        |
| Pyrokinin 2 R2                        | 28781  |                                        |        |
| ETH R                                 | 28783  |                                        |        |
| Proctolin R                           | 29414  |                                        |        |
| AKH R                                 | 29577  |                                        |        |
| Pyrokinin 2 R1                        | 29624  |                                        |        |
| Cardioacceleratory peptide R (CCAP R) | 31490  |                                        |        |
| SIFamide R                            | 34947  |                                        |        |

|                          |       |  |  |
|--------------------------|-------|--|--|
| Tachykinin like R at 86C | 31884 |  |  |
| Bursicon R               | 31958 |  |  |
| Pdf R                    | 38347 |  |  |
